# Supplementary material for: Plasma-induced on-surface sulfur vacancies in NiCo2S4 enhance the energy storage performance of supercapatteries
Source: Royal Society of Chemistry journal article supplement (doi:10.1039/d0ta01991g), 2020-01-01
Supplement: d0ta01991g1.pdf [file d0ta01991g1.pdf]

## Supporting Information

### **Plasma-induced on-surface sulfur vacancies in NiCo<sub>2</sub>S<sub>4</sub> enhance energy storage performance of supercapatteries**

Xiaoxiang Wang <sup>a</sup>, Rusen Zhou <sup>a</sup>, Chunmei Zhang <sup>a</sup>, Shibo Xi <sup>b</sup>, Michael W. M. Jones <sup>c</sup>, Tuquabo Tesfamichael <sup>a</sup>, Aijun Du <sup>a</sup>, Ke Gui <sup>a</sup>, Kostya (Ken) Ostrikov <sup>a</sup>, Hongxia Wang <sup>a,\*</sup>

<sup>a</sup>: School of Chemistry and Physics, Science and Engineering Faculty, Queensland University of Technology, Brisbane, QLD 4001, Australia

<sup>b</sup>: Institute of Chemical & Engineering Sciences, National University of Singapore

<sup>c</sup>: Central Analytical Research Facility, Institute for Future Environments, Queensland University of Technology, Brisbane, QLD 4001, Australia

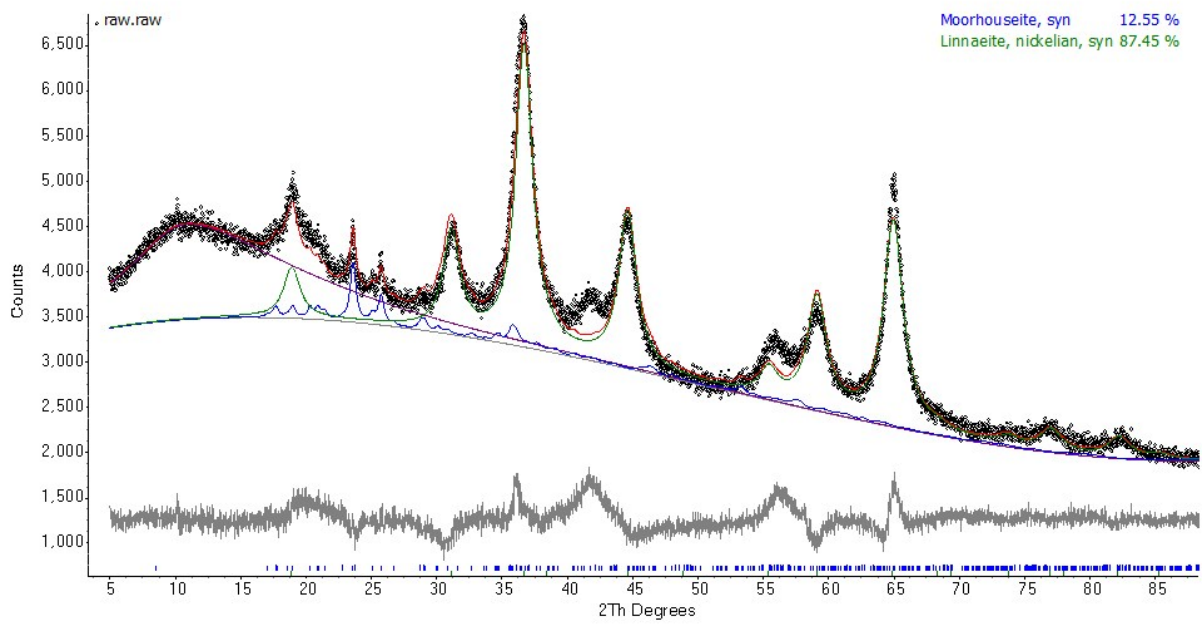

**Fig. S1** Fitted XRD pattern of pristine NiCoS-12

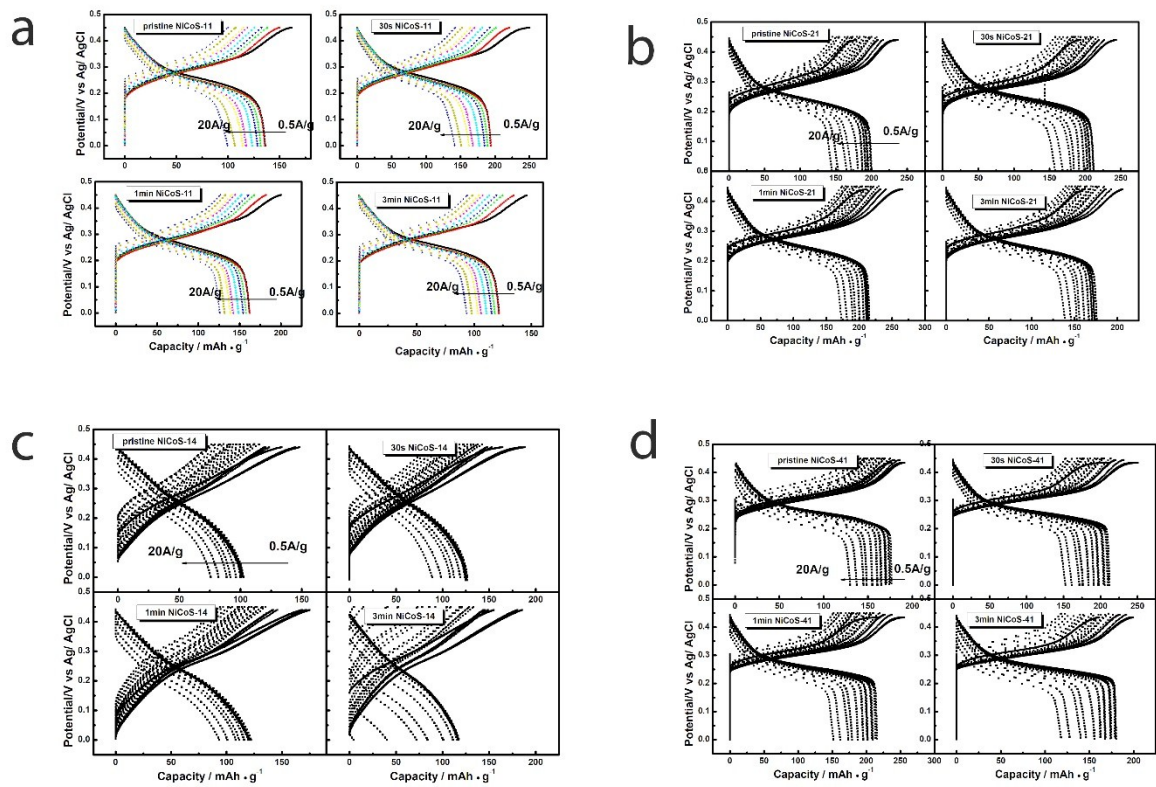

**Fig. S2** voltage vs. specific capacity of comparison group (various ratio of Ni/Co) with different plasma treatment duration **a**, NiCoS-11/CFC; **b**, NiCoS-21/CFC; **c**, NiCoS-14/CFC; **d**, NiCoS-41/CFC;

**Table S1.** EIS fitting results and equivalent circuit

| sample            | $R_s$ ( $\Omega$ ) | $R_{ct}$ ( $\Omega$ ) |
|-------------------|--------------------|-----------------------|
| Pristine NiCoS-12 | 2.491              | 0.378                 |
| 30s NiCoS-12      | 1.809              | 0.555                 |
| 1min NiCoS-12     | 2.248              | 1.434                 |
| 3min NiCoS-12     | 2.003              | 0.577                 |

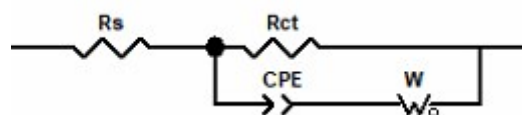

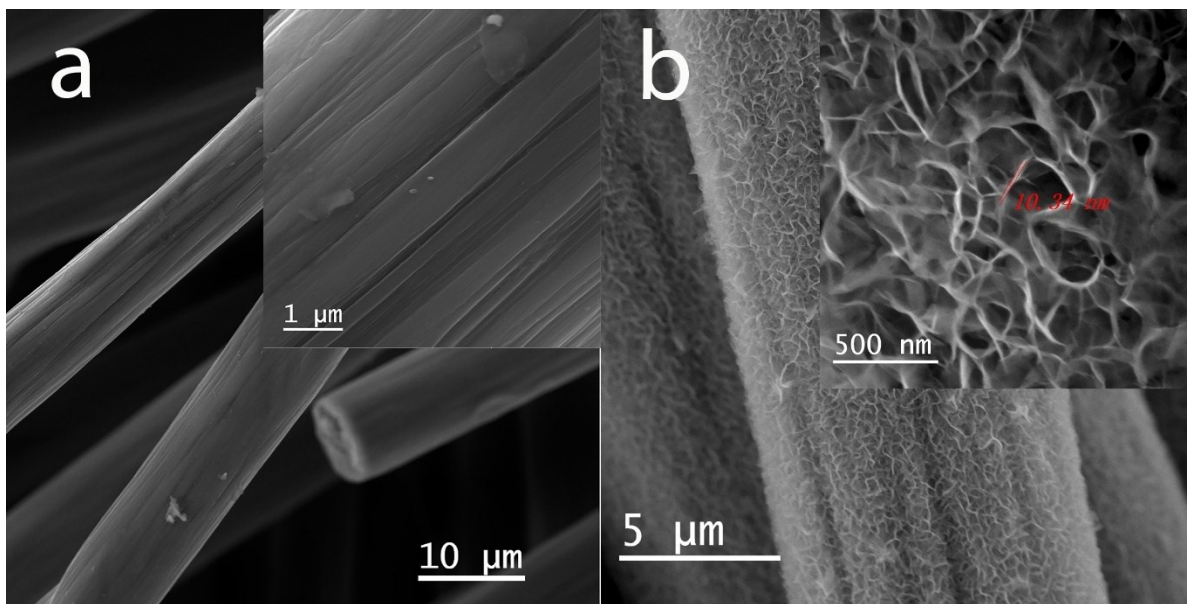

**Fig. S3** SEM images of **a**, bare CFC **b**, NiCoLDHs/CFC

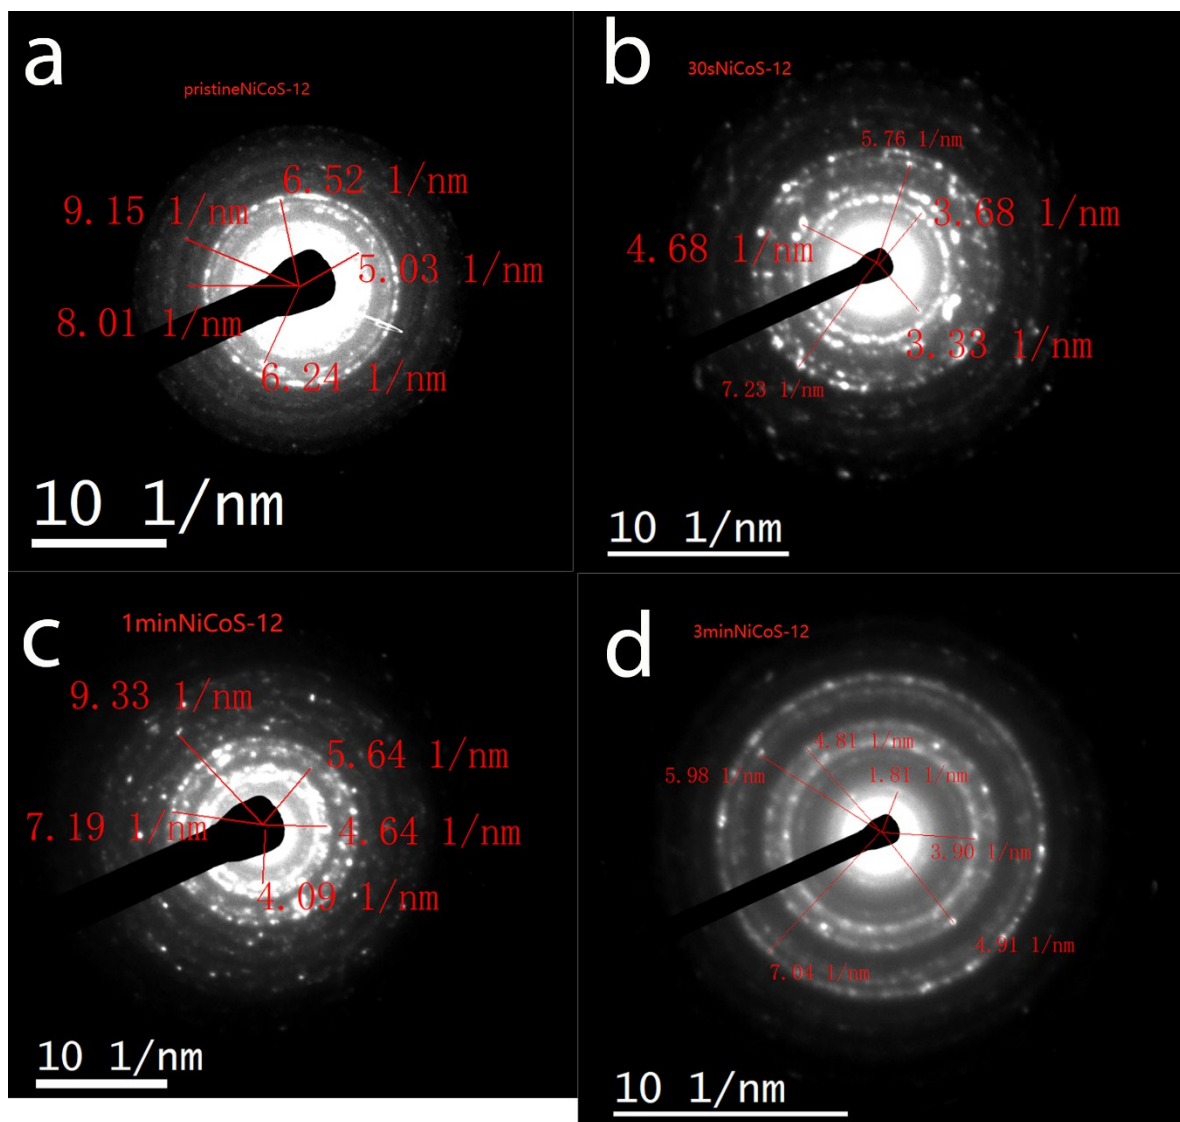

**Fig. S4 a-d** SAED pattern of pristine NiCoS-12/CFC, 30s NiCoS-12/CFC, 1min NiCoS-12/CFC, 3min NiCoS-12/CFC

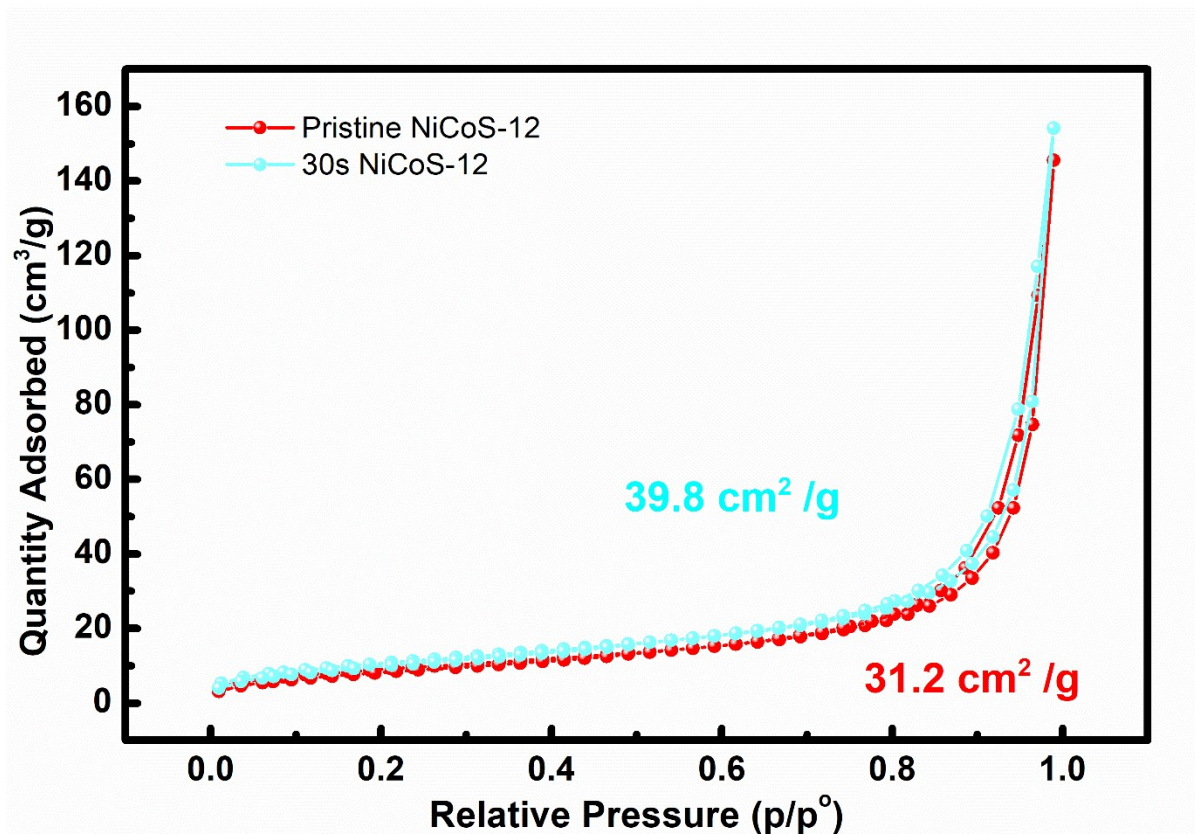

Fig. S5 N<sub>2</sub> sorption isotherms of pristine and 30s NiCoS-12

**Table S2.** XPS survey spectrum of the NiCoS-12/ CFC with different duration plasma treatment and the elements atomic ratios.

| XPS elements           | Pristine     | 30s          | 1min         | 3min         |
|------------------------|--------------|--------------|--------------|--------------|
| Atomic ratio in sample | NiCoS-12     | NiCoS-12     | NiCoS-12     | NiCoS-12     |
| Ni (%)                 | 2.79         | 2.85         | 2.87         | 1.63         |
| Co (%)                 | 5.86         | 5.64         | 5.04         | 3.28         |
| S (%)                  | <b>38.92</b> | <b>27.12</b> | <b>25.59</b> | <b>19.59</b> |
| C (%)                  | 27.24        | 39.07        | 37.69        | 55.06        |
| O (%)                  | 25.18        | 25.32        | 28.82        | 20.44        |



**Table S3.** Compositional ratio of  $\text{Ni}^{2+} / \text{Ni}^{3+}$  and  $\text{Co}^{2+} / \text{Co}^{3+}$  calculated from fitted Ni, Co HRXPS spectra

| Fitted<br>compositional<br>areal ratio | Pristine<br>NiCoS-12 | 30 s<br>NiCoS-12 | 1 min<br>NiCoS-12 | 3 min<br>NiCoS-12 |
|----------------------------------------|----------------------|------------------|-------------------|-------------------|
| $\text{Ni}^{2+} / \text{Ni}^{3+}$      | 1.329                | 1.371            | 1.484             | 1.820             |
| $\text{Co}^{2+} / \text{Co}^{3+}$      | 1.078                | 1.231            | 1.272             | 1.344             |

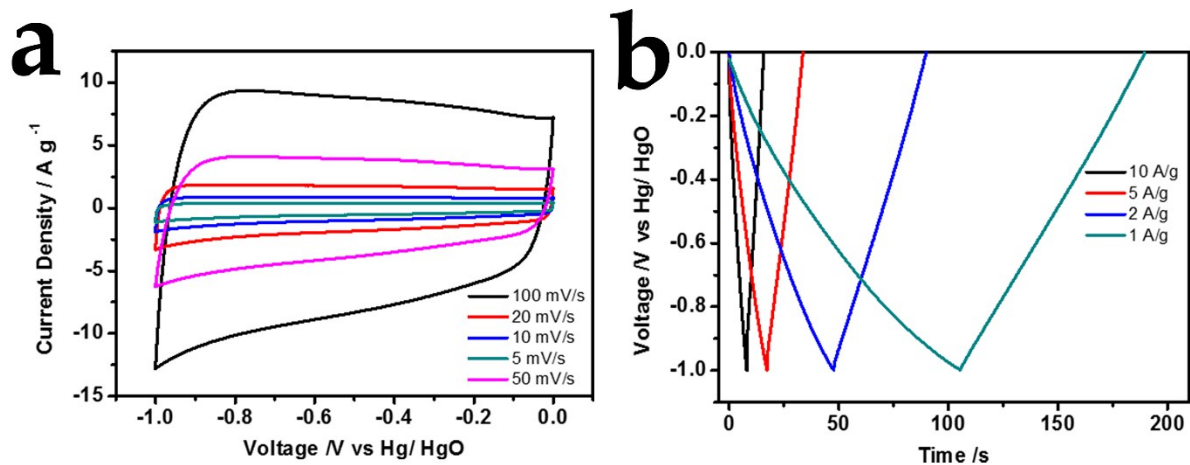

**Figure S 6.** a, CVs and b, GCD plots of negative material YP-50F commercial carbon.
